# Supplementary material for: Biological network analysis with deep learning
Source: PubMed Central journal article supplement (PMC7986589; doi:10.1093/bib/bbaa257), 2020-11-10
Supplement: main_table_2_as_supplementary_file_bbaa257.pdf [file main_table_2_as_supplementary_file_bbaa257.pdf]

Table 2. This table reports for each of the reviewed method the website where to find the implementation, if available.

|                                              | Method                                                                                        | Implementation                                                                                                                                                      |
|----------------------------------------------|-----------------------------------------------------------------------------------------------|---------------------------------------------------------------------------------------------------------------------------------------------------------------------|
| GNNs                                         | Bruna et al. [93]                                                                             | –                                                                                                                                                                   |
|                                              | Defferrard et al. [94]                                                                        | <a href="https://github.com/mdeff/cnn_graph">https://github.com/mdeff/cnn_graph</a>                                                                                 |
|                                              | Duvenaud et al. [95]                                                                          | <a href="http://github.com/HIPS/neural-fingerprint">http://github.com/HIPS/neural-fingerprint</a>                                                                   |
|                                              | Gilmer et al. [36]                                                                            | –                                                                                                                                                                   |
|                                              | Grover & Leskovec [54]                                                                        | <a href="https://github.com/aditya-grover/node2vec">https://github.com/aditya-grover/node2vec</a>                                                                   |
|                                              | Hamilton et al. [64]                                                                          | <a href="https://github.com/williamleif/GraphSAGE">https://github.com/williamleif/GraphSAGE</a>                                                                     |
|                                              | Kipf & Welling [96]                                                                           | <a href="https://github.com/tkipf/gcn">https://github.com/tkipf/gcn</a>                                                                                             |
|                                              | Niepert et al. [30]                                                                           | –                                                                                                                                                                   |
|                                              | Perozzi et al. [89]                                                                           | <a href="https://github.com/phanein/deepwalk">https://github.com/phanein/deepwalk</a>                                                                               |
| Tang et al. [90]                             | <a href="https://github.com/tangjianpku/LINE">https://github.com/tangjianpku/LINE</a>         |                                                                                                                                                                     |
| Proteomics                                   | Gligorijević et al. [71]                                                                      | <a href="https://github.com/VGligorijevic/deepNF">https://github.com/VGligorijevic/deepNF</a>                                                                       |
|                                              | Grover & Leskovec [54]                                                                        | <a href="https://github.com/aditya-grover/node2vec">https://github.com/aditya-grover/node2vec</a>                                                                   |
|                                              | Hamilton et al. [64]                                                                          | <a href="https://github.com/williamleif/GraphSAGE">https://github.com/williamleif/GraphSAGE</a>                                                                     |
|                                              | Liu et al. [60]                                                                               | –                                                                                                                                                                   |
|                                              | Senior et al. [76]                                                                            | <a href="https://github.com/deepmind/deepmind-research/tree/master/alphafold_casp13">https://github.com/deepmind/deepmind-research/tree/master/alphafold_casp13</a> |
|                                              | Yue et al. [41]                                                                               | <a href="https://github.com/xiangyue9607/BioNEV">https://github.com/xiangyue9607/BioNEV</a>                                                                         |
|                                              | Zeng et al. [56]                                                                              | <a href="https://github.com/CSUBioGroup/DeepEP">https://github.com/CSUBioGroup/DeepEP</a>                                                                           |
| Zhang & Kabuka [100]                         | –                                                                                             |                                                                                                                                                                     |
| Zitnik & Leskovec [65]                       | <a href="https://github.com/marinkaz/ohmnet">https://github.com/marinkaz/ohmnet</a>           |                                                                                                                                                                     |
| Drug Development, Discovery and Polypharmacy | Asada et al. [25]                                                                             | –                                                                                                                                                                   |
|                                              | Duvenaud et al. [95]                                                                          | <a href="http://github.com/HIPS/neural-fingerprint">http://github.com/HIPS/neural-fingerprint</a>                                                                   |
|                                              | Feinberg et al. [108]                                                                         | –                                                                                                                                                                   |
|                                              | Fout et al. [30]                                                                              | <a href="https://github.com/fouticus/pipgcn">https://github.com/fouticus/pipgcn</a>                                                                                 |
|                                              | Gilmer et al. [36]                                                                            | –                                                                                                                                                                   |
|                                              | Jiang et al. [55]                                                                             | –                                                                                                                                                                   |
|                                              | Kearnes et al. [33]                                                                           | –                                                                                                                                                                   |
|                                              | Li et al. [112]                                                                               | <a href="https://github.com/MingCPU/DeepChemStable">https://github.com/MingCPU/DeepChemStable</a>                                                                   |
|                                              | Liu et al. [111]                                                                              | –                                                                                                                                                                   |
|                                              | Ma et al. [43]                                                                                | –                                                                                                                                                                   |
|                                              | Manoochchri et al. [40]                                                                       | –                                                                                                                                                                   |
|                                              | Niepert et al. [30]                                                                           | –                                                                                                                                                                   |
|                                              | Shang et al. [44]                                                                             | <a href="https://github.com/sjy1203/GAMENet">https://github.com/sjy1203/GAMENet</a>                                                                                 |
|                                              | Stokes et al. [23]                                                                            | <a href="https://github.com/swansonk14/chemprop">https://github.com/swansonk14/chemprop</a>                                                                         |
|                                              | Torg & Altman [26]                                                                            | –                                                                                                                                                                   |
| Vaida & Purcell [27]                         | –                                                                                             |                                                                                                                                                                     |
| Wang et al. [45]                             | <a href="https://github.com/WOW5678/CompNet">https://github.com/WOW5678/CompNet</a>           |                                                                                                                                                                     |
| Zeng et al. [28]                             | <a href="https://github.com/ChengF-Lab/deepDTnet">https://github.com/ChengF-Lab/deepDTnet</a> |                                                                                                                                                                     |
| Zitnik et al. [46]                           | <a href="http://snap.stanford.edu/decagon">http://snap.stanford.edu/decagon</a>               |                                                                                                                                                                     |
| Disease Diagnosis                            | Han et al. [115]                                                                              | –                                                                                                                                                                   |
|                                              | Marzullo et al. [117]                                                                         | –                                                                                                                                                                   |
|                                              | Matsubara et al. [62]                                                                         | <a href="https://sites.google.com/site/nacherlab/analysis">https://sites.google.com/site/nacherlab/analysis</a>                                                     |
|                                              | Rhee et al. [72]                                                                              | –                                                                                                                                                                   |
|                                              | Sun et al. [118]                                                                              | –                                                                                                                                                                   |
|                                              | Zhang et al. [114]                                                                            | –                                                                                                                                                                   |
| Zhang et al. [116]                           | <a href="https://github.com/sheryl-ai/MVGCN">https://github.com/sheryl-ai/MVGCN</a>           |                                                                                                                                                                     |
| MN & GRN                                     | Baranwal et al. [52]                                                                          | <a href="https://github.com/baranwa2/MetabolicPathwayPrediction">https://github.com/baranwa2/MetabolicPathwayPrediction</a>                                         |
|                                              | Bove et al. [51]                                                                              | –                                                                                                                                                                   |
|                                              | Turki et al. [49]                                                                             | –                                                                                                                                                                   |
